# Supplementary material
Source: PubMed Central journal article supplement (PMC2529083)
Supplement: 0805465105_0805465105SI.pdf [file 0805465105_0805465105SI.pdf]

# Supporting Information

Clambey *et al.* 10.1073/pnas.0805465105

## SI Text

**SI Materials and Methods.** Antibodies used in this study included the following clones and sources. Antibodies from BD Pharmingen included (with clone name in parentheses): CD8 $\alpha$  (53-6.7), CD25 (PC61), integrin  $\alpha$ 4 [9C10(MFR4.B)], CD62L (MEL-14), IE<sup>k</sup> (14-4-4S), KLRG1 (2F1), Ly49A (A1), Ly49C/I (SW5E6), Ly49F (HBF-719), Ly49I (YLI-90), NK1.1 (PK136), TCR V $\beta$ 2 (B20.6), V $\beta$ 3 (KJ25), V $\beta$ 4 (KT4), V $\beta$ 5.1/5.2 (MR9-4), V $\beta$ 6 (RR4-7), V $\beta$ 8.1/8.2 (MR5-2), V $\beta$ 8.3 (1B3.3), V $\beta$ 8.1/8.2/8.3 (F23.1), V $\beta$ 9 (MR10-2), V $\beta$ 14 (14-2), VCAM1 [429(MVCAM.A)], and streptavidin-APC. Antibodies from eBioscience included: integrin  $\alpha$ 4 (R1-2), a rat IgG2b isotype control for R1-2, and PD-1 (J43). Antibodies from BioLegend were CD29 (HM $\beta$ 1-1) and CD61 [2C9.G2(Hmb3-1)]. Antibodies grown in our laboratory and/or conjugated with AlexaFluor647, Phycoerythrin, or PacificBlue (MolecularProbes) were: CD5 (53-7.313), CD44 (IM7.8.1), CD122 (TM- $\beta$ 1.4), CD127 (A7R34), MHC class II (Y3P), or TCR C $\beta$  (H57-597).

**RNA Purification and Microarray Analysis.** All samples collected for microarray analysis were frozen as dry-cell pellets on dry ice immediately after sorting and stored at  $-80^{\circ}\text{C}$ . Total RNA was purified from all samples in parallel by using the PicoPure RNA Isolation Kit (Arcturus). To obtain enough RNA for microarray analysis, all samples were subjected to double RNA amplification by using the RiboAmp OA RNA amplification kit (Arcturus). Amplified RNA samples were then labeled with biotin by using the Affymetrix GeneChip IVT labeling kit. Labeled antisense

RNA samples were purified (by using OA amplification kit purification columns) and fragmented. Fragmented, labeled RNA samples were then hybridized overnight onto Affymetrix mouse genome 430 2.0 microarray, containing 45,101 probe sets.

**Analysis of Microarray Data.** Analysis of microarray results was done by using GeneSpring 6.2 (Agilent Technologies). For all analyses, data were imported into GeneSpring and subjected to: (i) data transformation (set measurements  $<0.01$  to  $0.01$ ), and (ii) per chip normalization (normalized to the 50th percentile). Data were not subjected to per gene normalization. To identify genes altered in monoclonal expansions of CD8 memory T cells (TCEs) relative to polyclonal CD8 memory-phenotype (MP) T cells, data were separated into two groups: (i) TCEs (samples 2A, 4A, and 5A in [Table S1](#)) and (ii) polyclonal CD8 MP T cells (samples 2B, 4B, and 5B in [Table S1](#)). Genes whose expression was increased within TCEs were determined by three sequential analyses applied within GeneSpring: (i) samples were filtered on flags, to include only genes expressed (i.e., “present”) in three of three TCEs; (ii) samples were then subjected to one-way statistical test, comparing TCEs versus polyclonal CD8 MP T cells by using a Welch  $t$  test (parametric test, variances not assumed equal), with a  $P$  value cutoff of  $0.05$ ; and (iii) samples were filtered on fold change (threshold =  $2.0$ ) for genes increased in TCEs relative to polyclonal CD8 MP T cells. Samples were not subjected to multiple testing correction. For genes decreased in TCEs, the same set of criteria was used, except the polyclonal CD8 MP T cell group was used in step (i).

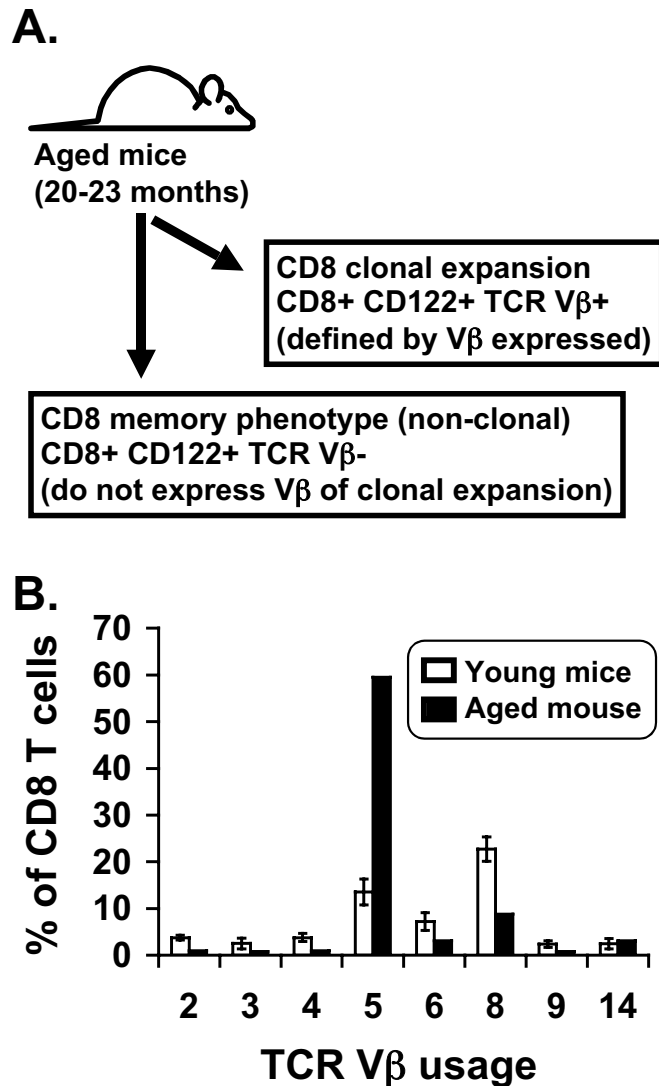

**Fig. S1.** Purification and identification of TCEs. (A) Purification of TCEs from aged mice. Mice with large TCEs were identified, as in B, and cells were purified as described. (B) Example of a large V $\beta$ 5+ TCE in a 19.5-month-old female C57BL/6J mouse (solid bars) compared to the average V $\beta$  usage in a group of 10, 3.5-month-old female C57BL/6J mice (open bars). V $\beta$  distribution defined as the percentage of peripheral blood CD8 $\alpha$ + cells expressing each V $\beta$ . Error bars indicate 3 SD of mean V $\beta$  usage in young mice.

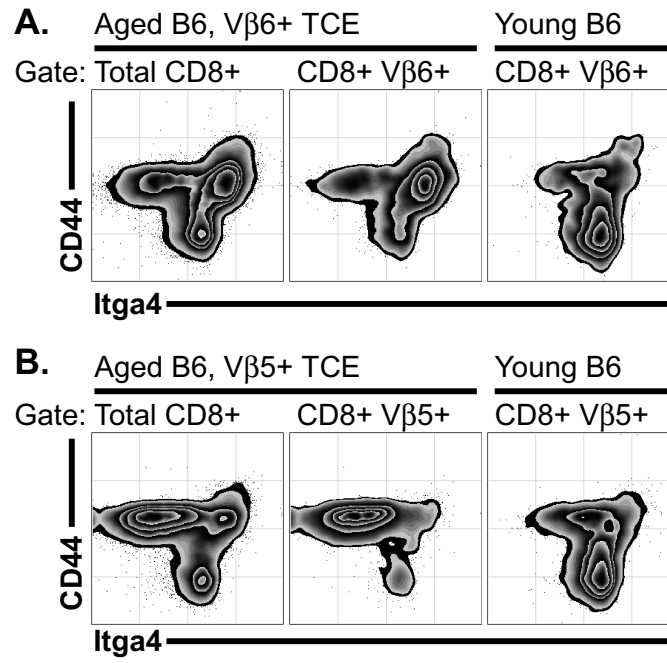

**Fig. S2.**  $itga4^{high}$  and  $itga4^{low}$  TCEs are  $CD44^{high}$ . Shown are CD44 expression levels in an  $itga4^{high}$  (A) and  $itga4^{low}$  (B) TCE. In each example, data include the  $itga4$  profile on bulk  $CD8\alpha+$  events (*Left*) within the aged mouse with the TCE, the  $itga4$  profile of the TCE in the same aged mouse defined by the indicated  $V\beta$  (*Center*), and the  $itga4$  profile of  $CD8\alpha+$  events within the same  $V\beta$  in a young mouse (*Right*).

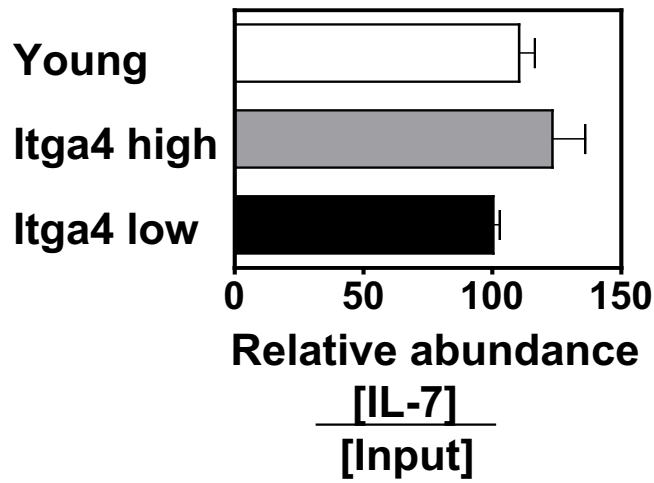

**Fig. S3.** *itga4<sup>high</sup>* and *itga4<sup>low</sup>* TCEs have equivalent short-term survival when cultured in low concentrations of IL-7. Bulk splenocytes were harvested from mice with *itga4<sup>high</sup>* ( $n = 3$ ) or *itga4<sup>low</sup>* ( $n = 4$ ) TCEs, and cells were cultured in 1 ng/ml IL-7 (R&D Systems), a condition that keeps cells alive but induces minimal proliferation in a naïve CD8 T cell. After 50 h, cultures were harvested and analyzed for the percentage of CD8 T cells that expressed the  $V\beta$  used for each individual TCE. Data represent (percentage of CD8+ $V\beta$ + cells in IL-7)/(percentage of CD8+ $V\beta$ + cells at time 0)  $\times$  100. All TCE samples were done in triplicate and data are plotted as mean  $\pm$  SEM for multiple TCEs. Samples were subjected to two-tailed, paired  $t$  test analysis, to determine samples that were significantly different from 100 (i.e., no advantage or disadvantage between two conditions). No sample had a statistically significant difference from 100.

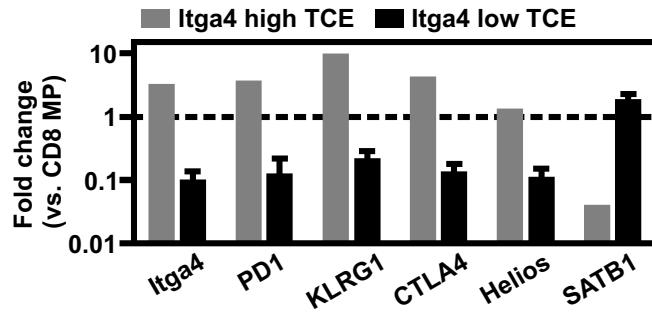

**Fig. S4.** *itga4*<sup>high</sup> and *itga4*<sup>low</sup> TCEs have divergent expression of two transcriptional regulators. Data show relative mRNA expression of the indicated genes in TCEs versus nonclonal CD8 MP T cells isolated from the same aged mice, calculated as (mRNA signal in the TCE)/(mRNA signal in the matched, nonclonal CD8 MP T cells). For these analyses, *itga4* phenotype was inferred based on relative *itga4* mRNA, with *itga4*<sup>high</sup> TCE (TCE 1) (Table S1) in gray ( $n = 1$ ), and *itga4*<sup>low</sup> TCEs (TCE 2, 4, 5) (Table S1) in black ( $n = 3$ , except  $n = 2$  for PD1). For *itga4*<sup>low</sup> TCEs, fold change for PD1, KLRG1, and CTLA4 was approximate, given that some TCEs had no detectable mRNA for these genes. Genes decreased in TCEs relative to nonclonal cells from the same mouse have a value  $< 1$ . Data was based on normalized microarray data, and for the *itga4*<sup>low</sup> TCEs plot mean  $\pm$  SEM.

**Table S1. Purified populations used for microarray analyses**

| Sample*         | Mouse Strain | Mouse ID # | Purified population                        | Age, months | Clonal expansion size <sup>†</sup> | Sort criteria <sup>‡</sup>                     | Purity <sup>§</sup> , % |
|-----------------|--------------|------------|--------------------------------------------|-------------|------------------------------------|------------------------------------------------|-------------------------|
| 1A <sup>¶</sup> | C57BL/10SnJ  | 33         | CD8 clonal expansion (CD8 <sup>low</sup> ) | 20          | 31.1% V $\beta$ 3                  | CD8 + CD122 + V $\beta$ 3+                     | 90.9                    |
| 1B              | C57BL/10SnJ  | 33         | Polyclonal CD8 memory                      | 20          | n/a                                | CD8 + CD122 + V $\beta$ 3 <sup>neg</sup>       | 96.8                    |
| 2A              | C57BL/10SnJ  | 19         | CD8 clonal expansion                       | 20          | 79.6% V $\beta$ 8.1/8.2            | CD8 + CD122 + V $\beta$ 8.1/8.2+               | 94.9                    |
| 2B              | C57BL/10SnJ  | 19         | Polyclonal CD8 memory                      | 20          | n/a                                | CD8 + CD122 + V $\beta$ 8.1/8.2 <sup>neg</sup> | 74.7                    |
| 4A              | C57BL/10SnJ  | 28         | CD8 clonal expansion                       | 23          | 63.2% V $\beta$ 8.3                | CD8 + CD122 + V $\beta$ 8.3+                   | 95.8                    |
| 4B              | C57BL/10SnJ  | 28         | Polyclonal CD8 memory                      | 23          | n/a                                | CD8 + CD122 + V $\beta$ 8.3 <sup>neg</sup>     | 65.7                    |
| 5A              | B10.BR       | 9          | CD8 clonal expansion                       | 23          | 50.4% V $\beta$ 14                 | CD8 + CD122 + V $\beta$ 14+                    | 98.1                    |
| 5B              | B10.BR       | 9          | Polyclonal CD8 memory                      | 23          | n/a                                | CD8 + CD122 + V $\beta$ 14 <sup>neg</sup>      | 97.2                    |

\*Unique identifier for clonal expansions used throughout manuscript.

<sup>†</sup>Percentage of CD8 + T cells that express the affected TCR V $\beta$ .

<sup>‡</sup>All samples were sorted on live cells, that were MHC class II negative. Additional sort criteria used as indicated.

<sup>§</sup>Percentage of live cells with phenotype listed in "Sort Criteria".

<sup>¶</sup>Sample 1A was a CD8<sup>low</sup> clonal expansion. All other clonal expansions were CD8<sup>normal</sup>.

**Table S2. Genes increased at least 2-fold in expression in three, independent CD8 clonal expansions (with normal CD8 levels) compared to polyclonal, aged matched CD8 memory phenotype T cells**

| Fold Change*      | Gene Symbol†         | Gene Title                                                        | Affymetrix Probe Set ID‡ | UniGene ID‡ |
|-------------------|----------------------|-------------------------------------------------------------------|--------------------------|-------------|
| 14.56             | Slc35f3              | solute carrier family 35, member F3                               | 1456764_at               | Mm.324992   |
| 3.88 <sup>§</sup> | Qser1                | glutamine and serine rich 1                                       | 1452331_s_at             | Mm.274314   |
| 3.66              | 2610305J24Rik        | RIKEN cDNA 2610305J24 gene                                        | 1426936_at               | Mm.410872   |
|                   | BC005512             | cDNA sequence BC005512                                            |                          |             |
|                   | LOC215866            | hypothetical protein LOC215866                                    |                          |             |
|                   | LOC629242            | hypothetical protein LOC629242                                    |                          |             |
|                   | LOC630153            | similar to melanoma antigen                                       |                          |             |
|                   | LOC630525            | similar to melanoma antigen                                       |                          |             |
|                   | LOC631386            | similar to melanoma antigen                                       |                          |             |
|                   | LOC637482            | similar to melanoma antigen                                       |                          |             |
|                   | LOC641366            | hypothetical ENV polyprotein                                      |                          |             |
|                   | LOC668904            | similar to melanoma antigen                                       |                          |             |
|                   | LOC669019            | hypothetical protein LOC669019                                    |                          |             |
|                   | LOC669231            | similar to melanoma antigen                                       |                          |             |
|                   | LOC669436            | hypothetical protein LOC669436                                    |                          |             |
|                   | LOC670270            | hypothetical protein LOC670270                                    |                          |             |
|                   | LOC670719            | similar to melanoma antigen                                       |                          |             |
|                   | LOC672061            | similar to melanoma antigen                                       |                          |             |
|                   | LOC672196            | similar to melanoma antigen                                       |                          |             |
|                   | LOC672939            | similar to melanoma antigen                                       |                          |             |
|                   | LOC673876            | similar to melanoma antigen                                       |                          |             |
|                   | LOC674912            | similar to melanoma antigen                                       |                          |             |
|                   | LOC674927            | similar to melanoma antigen                                       |                          |             |
|                   | LOC675168            | similar to melanoma antigen                                       |                          |             |
|                   | LOC675410            | similar to melanoma antigen                                       |                          |             |
|                   | LOC675706            | similar to melanoma antigen                                       |                          |             |
|                   | LOC676247            | similar to melanoma antigen                                       |                          |             |
|                   | LOC676718            | similar to melanoma antigen                                       |                          |             |
|                   | LOC677506            | similar to melanoma antigen                                       |                          |             |
| 3.34              | <b>6720489N17Rik</b> | RIKEN cDNA 6720489N17 gene                                        | 1440869_x_at             | Mm.247448   |
| 3.22              | <b>1500010J02Rik</b> | RIKEN cDNA 1500010J02 gene                                        | 1437713_x_at             | Mm.285785   |
| 3.03              | Gprasp1              | G protein-coupled receptor associated sorting protein 1           | 1447689_at               | Mm.271980   |
| 3.03              | Tmed2                | Transmembrane emp24 domain trafficking protein 2                  | 1460128_at               | Mm.325307   |
| 2.95              | <b>D11Erttd333e</b>  | DNA segment, Chr 11, ERATO Doi 333, expressed                     | 1447783_x_at             | Mm.44226    |
| 2.90              | <b>Kntc1</b>         | kinetochore associated 1                                          | 1435575_at               | Mm.332684   |
| 2.68              | 1110004B13Rik        | RIKEN cDNA 1110004B13 gene                                        | 1429058_at               | Mm.33964    |
| 2.57              | Gins4                | GINS complex subunit 4 (Sld5 homolog)                             | 1457981_x_at             | Mm.271603   |
| 2.56              | Qser1                | glutamine and serine rich 1                                       | 1427151_at               | Mm.274314   |
| 2.44              | Atxn2l               | ataxin 2-like                                                     | 1438668_x_at             | Mm.231450   |
| 2.36              | Ptcd1                | pentatricopeptide repeat domain 1                                 | 1416391_at               | Mm.332840   |
| 2.34              | Tlr1                 | toll-like receptor 1                                              | 1449049_at               | Mm.273024   |
| 2.33              | <b>Mtx1</b>          | Metaxin 1                                                         | 1447361_at               | Mm.280943   |
| 2.31              | Rab2                 | RAB2, member RAS oncogene family                                  | 1419946_s_at             | Mm.397471   |
| 2.30              | Aspm                 | asp (abnormal spindle)-like, microcephaly associated (Drosophila) | 1452459_at               | Mm.168523   |
| 2.20              | 4631422O05Rik        | RIKEN cDNA 4631422O05 gene                                        | 1428861_at               | Mm.328360   |
|                   | LOC667770            | similar to down-regulated in ovarian cancer 1 isoform 2           |                          |             |
|                   | LOC676704            | similar to down-regulated in ovarian cancer 1 isoform 2           |                          |             |
| 2.17              | Orc3l                | origin recognition complex, subunit 3-like (S. cerevisiae)        | 1416116_at               | Mm.260931   |
| 2.13              | Mcm7                 | minichromosome maintenance deficient 7 (S. cerevisiae)            | 1439269_x_at             | Mm.241714   |
|                   | LOC433027            | similar to minichromosome maintenance protein 7                   |                          |             |
| 2.13              | Asf1a                | ASF1 anti-silencing function 1 homolog A (S. cerevisiae)          | 1459882_at               | Mm.272989   |
| 2.09              | Pard6b               | par-6 (partitioning defective 6) homolog beta (C. elegans)        | 1423175_s_at             | Mm.292834   |
| 2.08              | C030039L03Rik        | RIKEN cDNA C030039L03 gene                                        | 1453649_at               | Mm.145362   |
| 2.07              | Mapk6                | mitogen-activated protein kinase 6                                | 1459146_at               | Mm.18856    |

| Fold Change* | Gene Symbol <sup>†</sup> | Gene Title                 | Affymetrix Probe Set ID <sup>‡</sup> | UniGene ID <sup>‡</sup> |
|--------------|--------------------------|----------------------------|--------------------------------------|-------------------------|
| 2.07         | <b>Zfp319</b>            | zinc finger protein 319    | 1455638_at                           | Mm.350514               |
| 2.01         | <b>1700084C06Rik</b>     | RIKEN cDNA 1700084C06 gene | 1432576_at                           | —                       |
| 2.00         | <b>0610040B10Rik</b>     | RIKEN cDNA 0610040B10 gene | 1456161_at                           | Mm.30983                |
| 2.00         | <b>Lasp1</b>             | LIM and SH3 protein 1      | 1438634_x_at                         | Mm.271967               |

\*Fold change indicates fold change between CD8 clonal expansions (samples 2A, 4A, and 5A) and polyclonal, CD8 memory phenotype T cells (samples 2B, 4B, and 5B), treating each group as a set of three replicates and calculating an average value for each group. Values calculated by using GeneSpring 6.2 (Agilent Technologies).

<sup>†</sup>Gene symbols in bold indicate genes whose expression was increased in all four CD8 clonal expansions (including the CD8<sup>low</sup>, clone 1) compared to paired, aged-matched nonclonal CD8 memory T cells.

<sup>‡</sup>Affymetrix Probe Set ID numbers were used to search the NetAffx database ([www.affymetrix.com](http://www.affymetrix.com)) for Gene symbols/Gene Titles/UniGene IDs in October 2006. For those Probe Sets that hybridize with multiple genes, or multiple loci, all potential genes are listed.

<sup>§</sup>Values in italics indicate genes in which fold change is an approximate value. For these samples, the gene was expressed in CD8 clonal expansions but undetectable (i.e. absent) in polyclonal, CD8 memory T cells. Given that the limit of detection varies between individual genes, these values are only an estimate and, in some cases, may overestimate the difference between two samples.



**Table S3. Genes decreased at least 2-fold in expression in three, independent CD8 clonal expansions (with normal CD8 levels) compared to polyclonal, aged matched CD8 memory phenotype T cells**

| Fold Change*       | Gene Symbol†         | Gene Title                                                                         | Affymetrix ProbeSet ID‡ | UniGene ID‡ |
|--------------------|----------------------|------------------------------------------------------------------------------------|-------------------------|-------------|
| 35.14 <sup>§</sup> | <b>A430107P09Rik</b> | RIKEN cDNA A430107P09 gene                                                         | 1441552_at              | Mm.423148   |
| 26.95              | Coch                 | coagulation factor C homolog (Limulus polyphemus)                                  | 1423285_at              | Mm.21325    |
| 23.40              | Gzmk                 | granzyme K                                                                         | 1422280_at              | Mm.56993    |
| 22.91              | <b>Xlr3a</b>         | X-linked lymphocyte-regulated 3A                                                   | 1420357_s_at            | Mm.195091   |
|                    | <b>Xlr3b</b>         | X-linked lymphocyte-regulated 3B                                                   |                         |             |
|                    | <b>MGC76689</b>      | hypothetical protein LOC574437                                                     |                         |             |
| 15.49              | Itga4                | integrin alpha 4                                                                   | 1421194_at              | Mm.33596    |
| 15.23              | Nr4a2                | Nuclear receptor subfamily 4, group A, member 2                                    | 1455034_at              | Mm.3507     |
| 14.30              | Cerkl                | ceramide kinase-like                                                               | 1436037_at              | Mm.31903    |
| 14.08              | Ptprj                | protein tyrosine phosphatase, receptor type, J                                     | 1425452_s_at            | Mm.330393   |
|                    | AW125753             | expressed sequence AW125753                                                        |                         |             |
| 13.12              | Zfpn1a2              | zinc finger protein, subfamily 1A, 2 (Helios)                                      | 1456956_at              | Mm.106343   |
| 11.86              | Casp1                | caspase 1                                                                          | 1449265_at              | Mm.1051     |
| 9.54               | Rab39b               | RAB39B, member RAS oncogene family                                                 | 1435014_at              | Mm.45148    |
| 9.34               | A730095J18Rik        | RIKEN cDNA A730095J18 gene                                                         | 1437542_at              | —           |
| 8.51               | Penk1                | preproenkephalin 1                                                                 | 1427038_at              | Mm.2899     |
| 8.13               | Maf                  | avian musculoaponeurotic fibrosarcoma (v-maf) AS42 oncogene homolog                | 1444073_at              | Mm.275549   |
| 7.41               | Casp4                | caspase 4, apoptosis-related cysteine peptidase                                    | 1449591_at              | Mm.1569     |
| 7.23               | Gmids                | GDP-mannose 4, 6-dehydratase                                                       | 1434158_at              | Mm.247143   |
| 6.68               | Nr4a2                | nuclear receptor subfamily 4, group A, member 2                                    | 1447863_s_at            | Mm.3507     |
| 6.50               | AI851523             | expressed sequence AI851523                                                        | 1440156_s_at            | Mm.381287   |
| 6.20               | Klrg1                | killer cell lectin-like receptor subfamily G, member 1                             | 1420788_at              | Mm.20434    |
| 6.17               | Perp                 | PERP, TP53 apoptosis effector                                                      | 1416271_at              | Mm.28209    |
| 6.09               | 6330403K07Rik        | RIKEN cDNA 6330403K07 gene                                                         | 1426766_at              | Mm.27768    |
| 5.39               | ligp1                | interferon inducible GTPase 1                                                      | 1419043_a_at            | Mm.261140   |
| 5.37               | <b>Dsg2</b>          | desmoglein 2                                                                       | 1439476_at              | Mm.345891   |
| 4.71               | Trak1                | trafficking protein, kinesin binding 1                                             | 1459666_at              | Mm.305318   |
| 4.36               | Tcrb-V8.2            | T cell receptor beta, variable 8.2                                                 | 1445895_at              | —           |
| 4.05               | Itga4                | Integrin alpha 4                                                                   | 1457376_at              | Mm.33596    |
| 3.67               | D19Wsu12e            | DNA segment, Chr 19, Wayne State University 12, expressed                          | 1446228_at              | Mm.267131   |
| 3.66               | Ints7                | Integrator complex subunit 7                                                       | 1443045_at              | Mm.338175   |
| 3.51               | Trat1                | T cell receptor associated transmembrane adaptor 1                                 | 1437561_at              | Mm.167298   |
| 3.48               | Slc4a7               | solute carrier family 4, sodium bicarbonate cotransporter, member 7                | 1457528_at              | Mm.258893   |
| 3.42               | Sp100                | Nuclear antigen Sp100                                                              | 1447213_at              | Mm.290906   |
| 3.38               | 2600010E01Rik        | RIKEN cDNA 2600010E01 gene                                                         | 1452834_at              | Mm.24138    |
| 3.36               | Nab1                 | Ngfi-A binding protein 1                                                           | 1448781_at              | Mm.25903    |
| 3.19               | Galnt2               | UDP-N-acetyl-alpha-D-galactosamine:polypeptide N-acetylgalactosaminyltransferase 2 | 1452182_at              | Mm.33808    |
| 3.09               | <b>Rnf149</b>        | ring finger protein 149                                                            | 1429321_at              | Mm.28614    |
| 3.06               | Traf5                | Tnf receptor-associated factor 5                                                   | 1448861_at              | Mm.389227   |
|                    | LOC622602            | similar to TNF receptor-associated factor 5                                        |                         |             |
| 3.04               | Art3                 | ADP-ribosyltransferase 3                                                           | 1452474_a_at            | Mm.263514   |
| 3.01               | —                    | —                                                                                  | 1438235_at              | —           |
| 2.90               | E130308A19Rik        | RIKEN cDNA E130308A19 gene                                                         | 1435931_at              | Mm.45688    |
| 2.84               | <b>Vamp4</b>         | vesicle-associated membrane protein 4                                              | 1422896_at              | Mm.10699    |
| 2.82               | —                    | Transcribed locus                                                                  | 1440883_at              | Mm.393779   |
| 2.69               | Itm2c                | integral membrane protein 2C                                                       | 1415961_at              | Mm.29870    |
| 2.69               | Rapgef1              | Rap guanine nucleotide exchange factor (GEF) 1                                     | 1427006_at              | Mm.298274   |
| 2.62               | 9030227G01Rik        | RIKEN cDNA 9030227G01 gene                                                         | 1458233_at              | Mm.152357   |
| 2.61               | <b>Zc3h12d</b>       | zinc finger CCCH-type containing 12D                                               | 1458504_at              | Mm.140055   |
| 2.58               | <b>Ski</b>           | Sloan-Kettering viral oncogene homolog                                             | 1426373_at              | Mm.28520    |
| 2.58               | Pes1                 | pescadillo homolog 1, containing BRCT domain (zebrafish)                           | 1416172_at              | Mm.28659    |
| 2.57               | Hnrpr                | Heterogeneous nuclear ribonucleoprotein R                                          | 1438807_at              | Mm.31051    |
| 2.55               | Tox                  | Thymocyte selection-associated HMG box gene                                        | 1446950_at              | Mm.87051    |
| 2.52               | C130098B18Rik        | RIKEN cDNA C130098B18 gene                                                         | 1446354_at              | —           |
| 2.50               | Sh2d1a               | SH2 domain protein 1A                                                              | 1449393_at              | Mm.235391   |
| 2.50               | Rora                 | RAR-related orphan receptor alpha                                                  | 1424034_at              | Mm.267116   |
| 2.49               | Tle3                 | transducin-like enhancer of split 3, homolog of Drosophila E(spl)                  | 1458512_at              | Mm.24255    |

| Fold Change* | Gene Symbol†         | Gene Title                                                                                                    | Affymetrix ProbeSet ID‡ | UniGene ID‡ |
|--------------|----------------------|---------------------------------------------------------------------------------------------------------------|-------------------------|-------------|
| 2.49         | Tcf4                 | transcription factor 4                                                                                        | 1416723_at              | Mm.392967   |
| 2.49         | —                    | Mus musculus, clone IMAGE:3983419, mRNA                                                                       | 1427195_at              | Mm.392140   |
| 2.45         | <b>Mns1</b>          | meiosis-specific nuclear structural protein 1                                                                 | 1419402_at              | Mm.387671   |
| 2.42         | Ddef1                | Development and differentiation enhancing                                                                     | 1438301_at              | Mm.277236   |
| 2.41         | Smpd13b              | sphingomyelin phosphodiesterase, acid-like 3B                                                                 | 1417300_at              | Mm.287187   |
| 2.37         | Foxo1                | Forkhead box O1                                                                                               | 1459170_at              | Mm.29891    |
| 2.31         | Lck                  | Lymphocyte protein tyrosine kinase                                                                            | 1457917_at              | Mm.293753   |
| 2.28         | Necap1               | NECAP endocytosis associated 1                                                                                | 1448106_at              | Mm.288114   |
| 2.27         | Mtdh                 | Metadherin                                                                                                    | 1456548_at              | Mm.130883   |
| 2.25         | St6 galnac3          | ST6 (alpha-N-acetyl-neuraminyl-2,3-beta-galactosyl-1,3)-N-acetylgalactosaminide alpha-2,6-sialyltransferase 3 | 1440121_at              | Mm.296453   |
| 2.23         | Kif5c                | kinesin family member 5C                                                                                      | 1422945_a_at            | Mm.256342   |
| 2.22         | 5430434G16Rik        | RIKEN cDNA 5430434G16 gene                                                                                    | 1432850_at              | —           |
| 2.22         | Tcf12                | Transcription factor 12                                                                                       | 1438762_at              | Mm.171615   |
| 2.22         | <b>9230104K21Rik</b> | RIKEN cDNA 9230104K21 gene                                                                                    | 1442406_at              | —           |
| 2.18         | Zwint                | ZW10 interactor                                                                                               | 1429786_a_at            | Mm.62876    |
| 2.18         | —                    | —                                                                                                             | 1438814_at              | —           |
| 2.17         | Armet                | arginine-rich, mutated in early stage tumors                                                                  | 1428112_at              | Mm.29778    |
| 2.17         | A530052I06Rik        | RIKEN cDNA A530052I06 gene                                                                                    | 1458933_at              | —           |
| 2.17         | Sft2d2               | SFT2 domain containing 2                                                                                      | 1425026_at              | Mm.288369   |
| 2.17         | Stk4                 | serine/threonine kinase 4                                                                                     | 1421107_at              | Mm.234472   |
| 2.16         | Mical1               | microtubule associated monooxygenase, calponin and LIM domain containing 1                                    | 1416759_at              | Mm.290431   |
| 2.15         | <b>Spred2</b>        | Sprouty-related, EVH1 domain containing 2                                                                     | 1441415_at              | Mm.266627   |
| 2.14         | Rps15a               | ribosomal protein S15a                                                                                        | 1430290_at              | Mm.288212   |
|              | LOC434460            | similar to ribosomal protein S15a                                                                             |                         |             |
|              | LOC664903            | similar to ribosomal protein S15a                                                                             |                         |             |
|              | LOC675729            | similar to ribosomal protein S15a                                                                             |                         |             |
| 2.13         | Gprk5                | G protein-coupled receptor kinase 5                                                                           | 1449514_at              | Mm.279400   |
| 2.13         | —                    | Transcribed locus                                                                                             | 1438819_at              | Mm.336778   |
| 2.13         | Cugbp2               | CUG triplet repeat, RNA binding protein 2                                                                     | 1446670_at              | Mm.147091   |
| 2.13         | Stat1                | signal transducer and activator of transcription 1                                                            | 1450033_a_at            | Mm.277406   |
| 2.12         | BB045044             | expressed sequence BB045044                                                                                   | 1443387_at              | —           |
| 2.12         | Plekhb2              | pleckstrin homology domain containing, family B (evectins) member 2                                           | 1460341_at              | Mm.292751   |
| 2.10         | Ier3                 | immediate early response 3                                                                                    | 1419647_a_at            | Mm.25613    |
| 2.08         | Ddb1                 | damage specific DNA binding protein 1                                                                         | 1415735_at              | Mm.289915   |
| 2.07         | Kpna4                | Karyopherin (importin) alpha 4                                                                                | 1442928_at              | Mm.30601    |
| 2.06         | Casp3                | caspase 3                                                                                                     | 1449839_at              | Mm.34405    |
| 2.06         | 9630010G10Rik        | RIKEN cDNA 9630010G10 gene                                                                                    | 1460121_at              | —           |
| 2.05         | Ttn                  | titin                                                                                                         | 1427446_s_at            | Mm.373672   |
| 2.04         | Ahi1                 | Abelson helper integration site                                                                               | 1455177_at              | Mm.253280   |
| 2.03         | Braf                 | Braf transforming gene                                                                                        | 1445786_at              | Mm.245513   |
| 2.02         | Arih2                | ariadne homolog 2 (Drosophila)                                                                                | 1449119_at              | Mm.290447   |
| 2.02         | BC028789             | cDNA sequence BC028789                                                                                        | 1460064_at              | —           |
| 2.01         | Ndr3                 | N-myc downstream regulated gene 3                                                                             | 1417663_a_at            | Mm.279256   |
| 2.01         | LOC383103            | similar to RIKEN cDNA 1810036I24                                                                              | 1435130_at              | —           |

\*Fold change indicates fold change between CD8 clonal expansions (samples 2A, 4A, and 5A) and polyclonal, CD8 memory phenotype T cells (samples 2B, 4B, and 5B), treating each group as a set of three replicates and calculating an average value for each group. Values calculated by using GeneSpring 6.2 (Agilent Technologies).

†Gene symbols in bold indicate genes whose expression was also decreased in all four CD8 clonal expansions (including the CD8<sup>low</sup>, clone 1) compared to paired, aged-matched nonclonal CD8 memory T cells.

‡Affymetrix Probe Set ID numbers were used to search the NetAffx database ([www.affymetrix.com](http://www.affymetrix.com)) for Gene symbols/Gene Titles/UniGene IDs in October 2006. For those Probe Sets that hybridize with multiple genes, or multiple loci, all potential genes are listed.

§Values in italics indicate genes in which fold change is an approximate value. For these samples, the gene was expressed in polyclonal, CD8 memory T cells but undetectable (i.e. absent) in CD8 clonal expansions. Given that the limit of detection varies between individual genes, these values are only an estimate and, in some cases, may overestimate the difference between two samples.

**Table S4. Characteristics of integrin  $\alpha 4$ -defined TCE subtypes**

| Phenotype                                    | Integrin $\alpha 4$ high                                             | Integrin $\alpha 4$ mid       | Integrin $\alpha 4$ low       |
|----------------------------------------------|----------------------------------------------------------------------|-------------------------------|-------------------------------|
| Prevalence*                                  | 41.4%                                                                | 10.3%                         | 48.3%                         |
| Largest clone identified <sup>†</sup>        | 75.1% V $\beta 5x^{\ddagger}$                                        | 83.3% V $\beta 8x^{\ddagger}$ | 84.9% V $\beta 8x^{\ddagger}$ |
| Stability <sup>§</sup>                       | Unstable                                                             | Stable                        | Stable                        |
| Age range, months <sup>¶</sup>               | 11.5–20.5                                                            | 16.5–22.5                     | 18.5–36                       |
| Response to stimulation <sup>  </sup>        | Impaired                                                             | Not tested                    | Normal                        |
| In vivo localization**                       | Absent from peripheral lymph nodes                                   | Not tested                    | Absent from Peyer's patches   |
| Markers of chronic stimulation <sup>††</sup> | CD8 low<br>IL7R $\alpha$ low<br>IL2R $\beta$ mid<br>PD-1 + or KLRG1+ | Not tested                    | None                          |

\*Prevalence of integrin  $\alpha 4$ -defined TCEs (excluding ambiguous/mixed phenotypes), using data from Figure 1B.

<sup>†</sup>Based on data from 31 clones (within 27 aged mice), with 13 integrin  $\alpha 4^{\text{high}}$ , 3 integrin  $\alpha 4^{\text{mid}}$ , 15 integrin  $\alpha 4^{\text{low}}$ . These clonal expansions include those displayed in Figure 1B plus additional clones identified in subsequent analyses.

<sup>‡</sup>Clonal expansions were identified by using antibodies that recognize multiple members of the indicated TCR V $\beta$ . V $\beta 8x$  indicates that clone could be V $\beta 8.1$ , 8.2, or 8.3. V $\beta 5x$  indicates that clone could be V $\beta 5.1$  or 5.2. On average, young B6 mice have 13.7% CD8 $\alpha^+$ V $\beta 5x^+$  cells and 23.6% CD8 $\alpha^+$ V $\beta 8x^+$  cells in peripheral blood.

<sup>§</sup>Based on data from Figure 2.

<sup>¶</sup>Age range indicates the youngest and oldest age of mice in which CD8 clonal expansions with each of the integrin  $\alpha 4$  phenotypes were identified. This analysis is different from Figure 2A, which is only a cross-sectional analysis and does not indicate the oldest age at which each subtype of clonal expansion is present.

<sup>||</sup>Based on response to phorbol 12-myristate 13-acetate (PMA) and ionomycin stimulation, Figure 4A.

\*\*Based on Figure 3.

<sup>††</sup>Based on Figure 4 B–D and Table S5.

**Table S5. Cell surface phenotype of integrin  $\alpha 4^{\text{high}}$  and integrin  $\alpha 4^{\text{low}}$  CD8 clonal expansions**

| Cell surface protein        | Integrin $\alpha 4$ high expansions | Integrin $\alpha 4$ low expansions | Function of protein              |
|-----------------------------|-------------------------------------|------------------------------------|----------------------------------|
| CD8 $\alpha$                | Low                                 | Normal                             | Coreceptor for TCR engagement    |
| CD44                        | High                                | High                               | Adhesion, Trafficking            |
| Integrin $\alpha 4$ (CD49d) | High                                | Low                                | Adhesion, Trafficking            |
| CD29                        | Mid/High                            | Mid                                | Adhesion, Trafficking            |
| CD62L                       | Low                                 | Mid/High                           | Adhesion, Trafficking            |
| IL-2/15R $\beta$ (CD122)    | Intermediate (>naïve CD8)           | High                               | Cytokine receptor (IL-15, IL-2)  |
| IL-7R $\alpha$ (CD127)      | Low*                                | High                               | Cytokine receptor (IL-7)         |
| PD-1                        | Positive <sup>†</sup>               | Negative                           | Inhibitory receptor              |
| KLRG1                       | Positive <sup>†</sup>               | Negative                           | Inhibitory receptor              |
| Ly49A/C/F/I                 | Negative                            | Negative                           | Inhibitory receptors             |
| NK1.1                       | Low                                 | Low                                | Activating receptor <sup>‡</sup> |

Data are compiled from two independent experiments. For all conclusions, cells were analyzed by flow cytometry, and gated on CD8+CD44<sup>high</sup>V $\beta$ + cells (appropriate for the affected V $\beta$ ).

\*The majority of each integrin  $\alpha 4^{\text{high}}$  clone was IL-7R $\alpha$  low. However, a minor fraction of each clone expressed normal levels of IL-7R $\alpha$ .

<sup>†</sup>For PD-1 and KLRG1 expression, integrin  $\alpha 4^{\text{high}}$  clonal expansions have variable expression (see Fig. 4).

<sup>‡</sup>All mice analyzed here were either C57BL/6J or B6.PL. As such, the antibody used to detect the NK1.1 antigen (PK136) detects the activating receptor gene product Klrp1c/NKR-P1C.
